# Supplementary material for: The Association of Overt and Subclinical Hyperthyroidism with the Risk of Cardiovascular Events and Cardiovascular Mortality: Meta-Analysis and Systematic Review of Cohort Studies
Source: PubMed Central journal article supplement — Endocrinol Metab (Seoul). 2020 Nov 25;35(4):786–800. doi: 10.3803/EnM.2020.728 (PMC7803602; doi:10.3803/enm.2020.728), 2020-11-25
Supplement: enm-2020-728-suppl2.pdf [file enm-2020-728-suppl2.pdf]

**Supplemental Table S2.** Newcastle Ottawa Quality Assessment Scale for Included Cohort Studies

| Study                        | Selection | Comparability | Outcome | Total |
|------------------------------|-----------|---------------|---------|-------|
| Kim et al. (2020) [26]       | ***       | **            | **      | 7/9   |
| Okosieme et al. (2019) [32]  | ***       | **            | ***     | 8/9   |
| Langen et al. (2018) [28]    | ***       | **            | ***     | 8/9   |
| Ryodi et al. (2018) [17]     | ***       | **            | **      | 7/9   |
| Journy et al. (2017) [25]    | ***       | **            | **      | 7/9   |
| Giesecke et al. (2017) [21]  | ***       | **            | ***     | 8/9   |
| Martin et al. (2017) [29]    | ***       | **            | **      | 7/9   |
| Pearce et al. (2016) [33]    | ***       | **            | **      | 7/9   |
| Bruere et al. (2015) [9]     | ***       | **            | ***     | 8/9   |
| Geng et al. (2015) [20]      | **        | **            | **      | 6/9   |
| la Cour et al. (2015) [27]   | ***       | **            | ***     | 8/9   |
| Yang et al. (2015) [42]      | ***       | **            | **      | 7/9   |
| Chen et al. (2014) [13]      | ***       | **            | **      | 7/9   |
| Drechsler et al. (2014) [16] | ***       | **            | **      | 7/9   |
| Perez et al. (2014) [34]     | ***       | **            | **      | 7/9   |
| Brandt et al. (2013) [8]     | ***       | **            | ***     | 8/9   |
| Ceresini et al. (2013) [11]  | ***       | **            | **      | 7/9   |
| Asvold et al. (2012) [5]     | ***       | **            | **      | 7/9   |
| Nanchen et al. (2012) [31]   | ***       | **            | **      | 7/9   |
| Waring et al. (2012) [41]    | ***       | **            | ***     | 8/9   |
| Molinaro et al. (2012) [30]  | ***       | **            | **      | 7/9   |
| de Jongh et al. (2011) [15]  | ***       | **            | **      | 7/9   |
| Schultz et al. (2011) [36]   | ***       | **            | ***     | 8/9   |
| Boekholdt et al. (2010) [7]  | ***       | **            | **      | 7/9   |
| Ittermann et al. (2010) [24] | ***       | **            | **      | 7/9   |
| Sheu et al. (2010) [38]      | ***       | **            | ***     | 8/9   |
| Sgarbi et al. (2010) [37]    | ***       | **            | ***     | 8/9   |
| Siu et al. (2009) [39]       | ***       | **            | **      | 7/9   |
| Volzke et al. (2009) [40]    | ***       | **            | ***     | 8/9   |
| Rodondi et al. (2008) [35]   | ***       | **            | ***     | 8/9   |
| Bauer et al. (2007) [6]      | ***       | *             | ***     | 7/9   |
| Iervasi et al. (2007) [23]   | ***       | **            | **      | 7/9   |
| Cappola et al. (2006) [10]   | ****      | **            | **      | 8/9   |
| Qureshi et al. (2006) [44]   | ***       | **            | ***     | 8/9   |
| Walsh et al. (2005) [46]     | ****      | **            | **      | 8/9   |
| Gussekloo et al. (2004) [22] | ***       | **            | **      | 7/9   |
| Parle et al. (2001) [43]     | ***       | **            | ***     | 8/9   |
