# Supplementary material for: The Association of Overt and Subclinical Hyperthyroidism with the Risk of Cardiovascular Events and Cardiovascular Mortality: Meta-Analysis and Systematic Review of Cohort Studies
Source: PubMed Central journal article supplement — Endocrinol Metab (Seoul). 2020 Nov 25;35(4):786–800. doi: 10.3803/EnM.2020.728 (PMC7803602; doi:10.3803/enm.2020.728), 2020-11-25
Supplement: enm-2020-728-suppl3.pdf [file enm-2020-728-suppl3.pdf]

**Supplemental Table S3.** Subgroup Analysis of the Association between Overt Hyperthyroidism and the Risk of Cardiovascular Events According to Treatment Modality or Iodine Intake

| Subgroup               | Pooled HR<br>(95% CI) | $I^2$ , % | No. of<br>studies |
|------------------------|-----------------------|-----------|-------------------|
| Ischemic heart disease |                       |           |                   |
| Iodine intake          |                       |           |                   |
| Sufficient area        | 1.15 (1.03–1.29)      | 0         | 2                 |
| Deficient area         | 1.08 (0.98–1.18)      | 0         | 2                 |
| Stroke                 |                       |           |                   |
| Iodine intake          |                       |           |                   |
| Sufficient area        | 1.32 (1.09–1.59)      | 65        | 7                 |
| Deficient area         | 1.21 (1.12–1.30)      | 15        | 4                 |
| Heart failure          |                       |           |                   |
| Iodine intake          |                       |           |                   |
| Sufficient area        | NA                    | NA        | 0                 |
| Deficient area         | 1.42 (0.93–2.16)      | 90.6      | 2                 |
| CV mortality           |                       |           |                   |
| Iodine intake          |                       |           |                   |
| Sufficient area        | 1.26 (1.06–1.50)      | 62        | 3                 |
| Deficient area         | 1.17 (0.92–1.48)      | 80        | 4                 |

HR, hazard ratio; CI, confidence interval; NA, not available; CV, cardiovascular.
